Anesthesiology  
68:180, 1988

*In Reply:*—Arrow International first introduced the Antecubital Central Venous Catheterization Kit, Product No. AK-04250, in July of 1986. The product is very successful to date. Prior to Dr. Donegan's and Rupp's article, Arrow has received only one report regarding the problem described in their letter.

In response to the initial report, Arrow instituted a study to evaluate whether or not heparin bonding of the same catheter would obviate this problem. If positive

results are obtained, Arrow will take appropriate action to heparin bond this catheter.

PAUL L. FRANKHOUSER  
*Vice President of Marketing*  
*Arrow International, Inc*  
*P. O. Box 6306*  
*Hill and George Avenues*  
*Reading, Pennsylvania 19610*

*(Accepted for publication October 1, 1987.)*
